# Supplementary material
Source: PubMed Central journal article supplement (PMC6533141)

## Bisubstrate Inhibitors to Target Histone Acetyltransferase 1 (HAT1)

Liza Ngo, Tyler Brown, Y. George Zheng \*

Department of Pharmaceutical and Biomedical Sciences, College of Pharmacy, University of Georgia, Athens, Georgia, 30302, U.S.A.

\* To whom correspondence should be addressed: [yzheng@uga.edu](mailto:yzheng@uga.edu).

### Supporting Information

**Figure S1: MALDI-MS spectra of bisubstrate inhibitors.** The identities of all the peptides were analyzed via matrix assisted laser desorption/ionization mass spectrometry (MALDI-MS) on the Bruker Daltonics, model Autoflex with a 0.02% error.

#### H4K5CoA

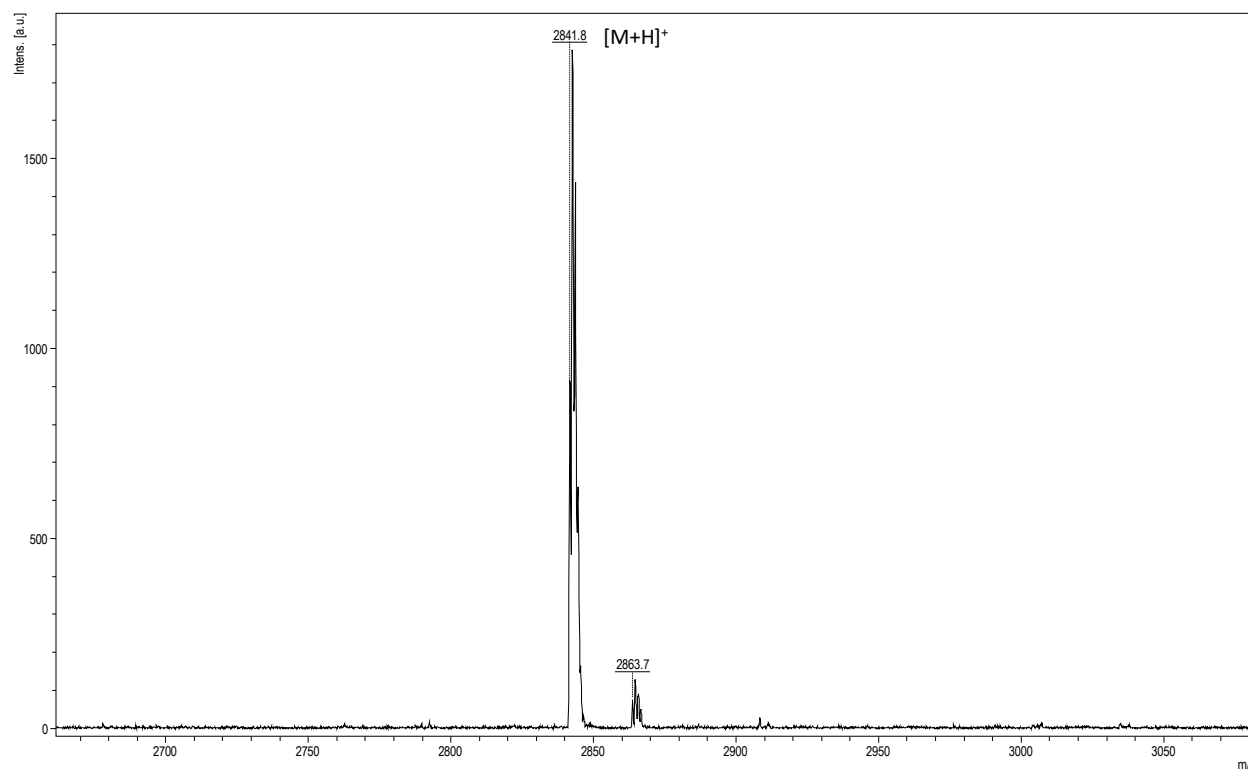

# H4K8CoA

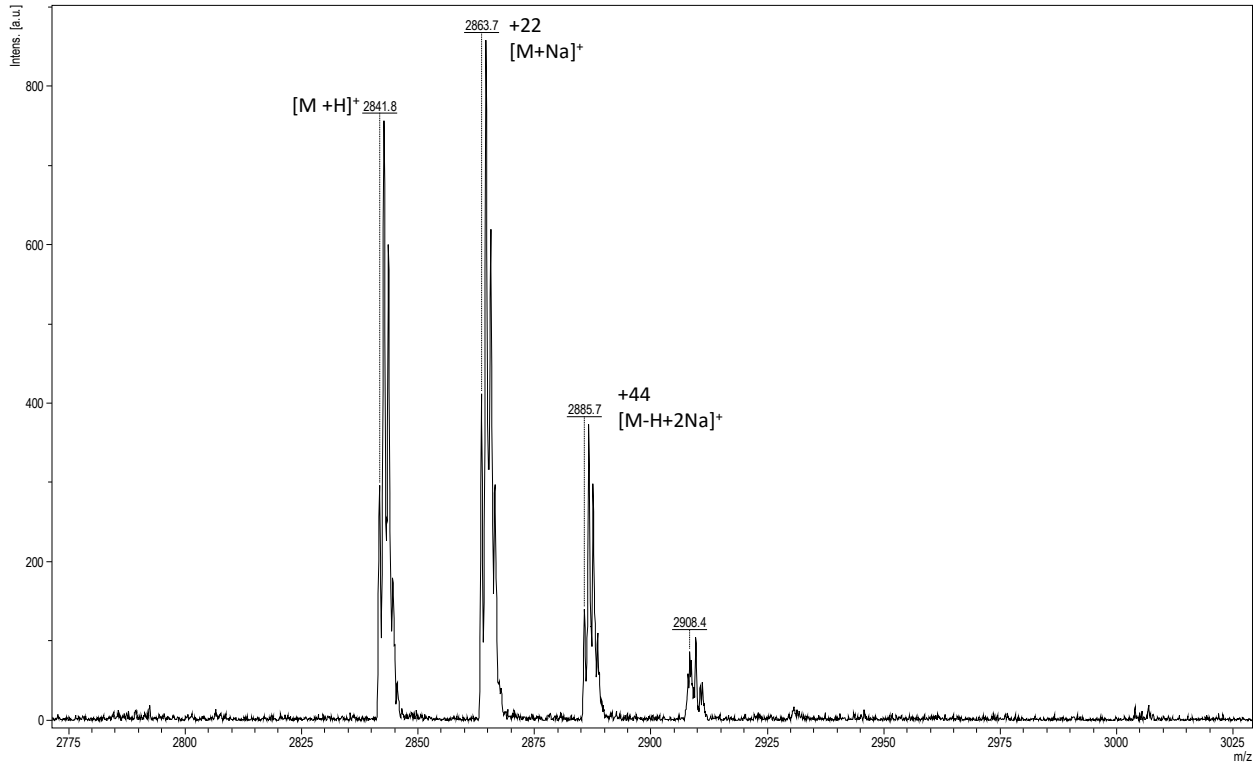

# H4K12CoA

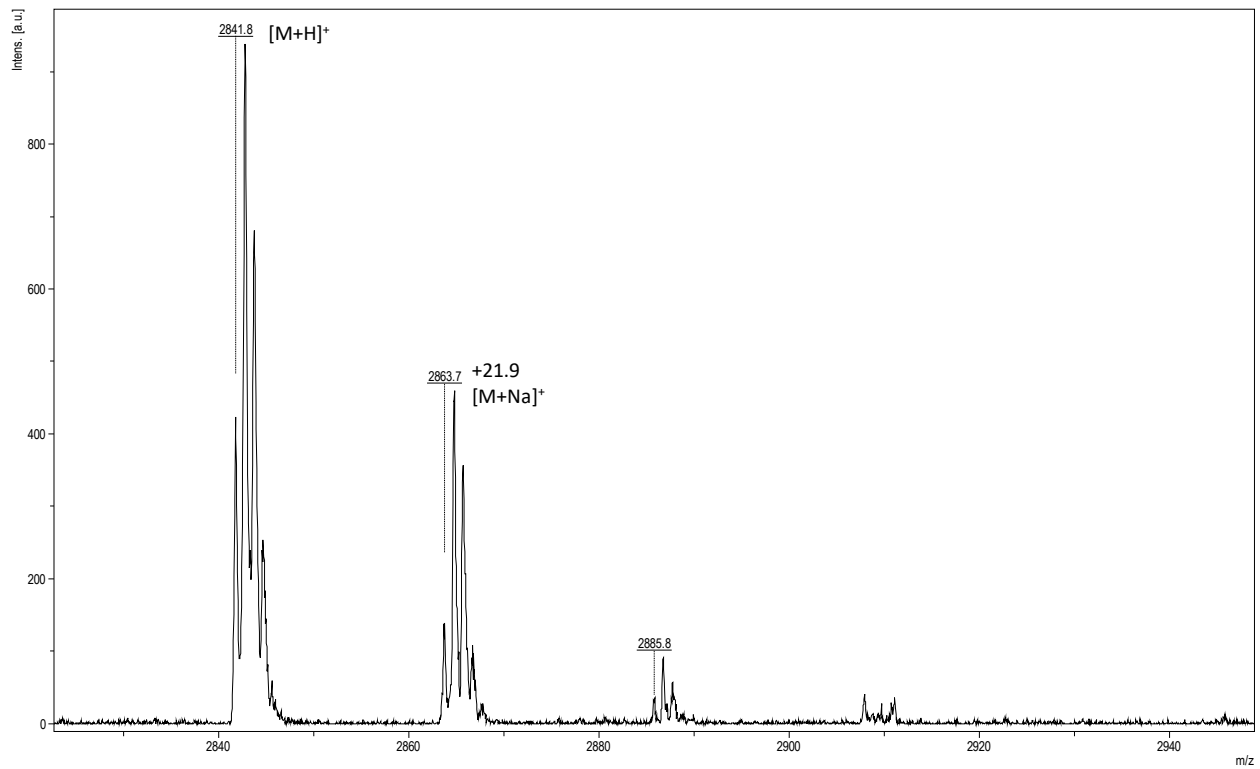

# H4K16CoA

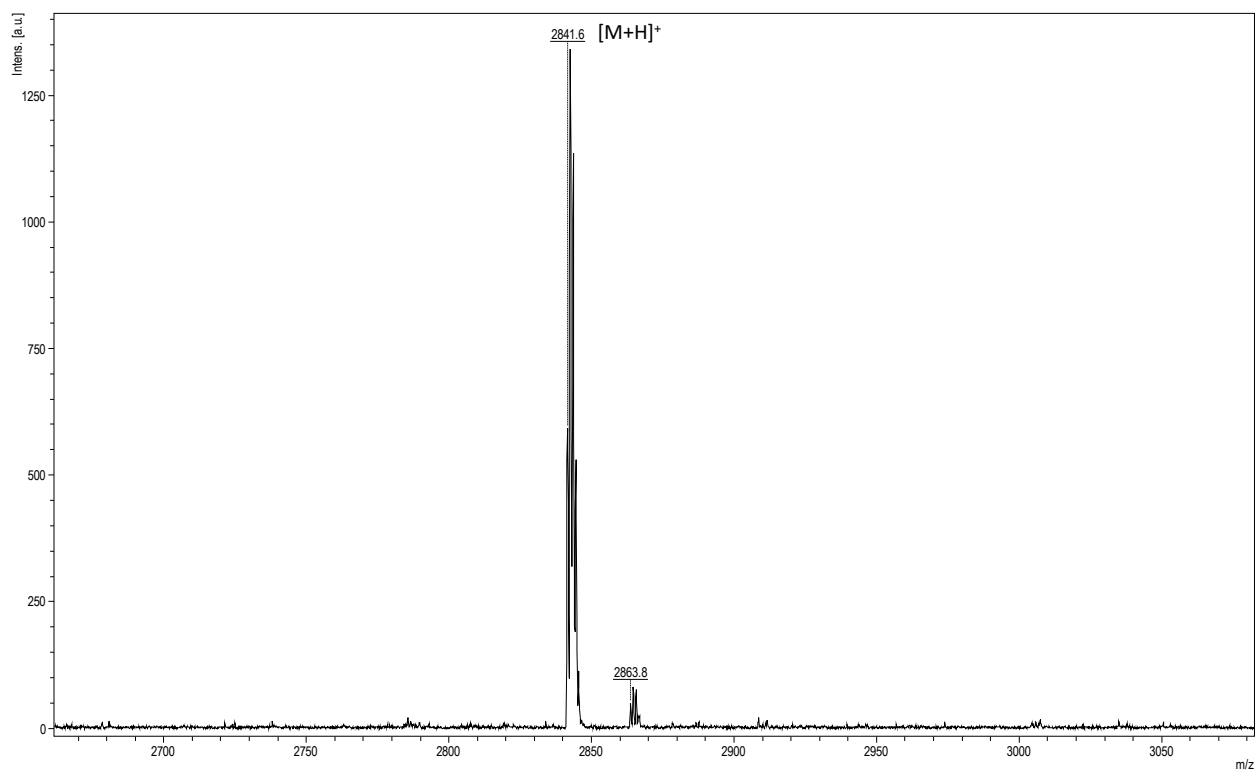

# Lys CoA

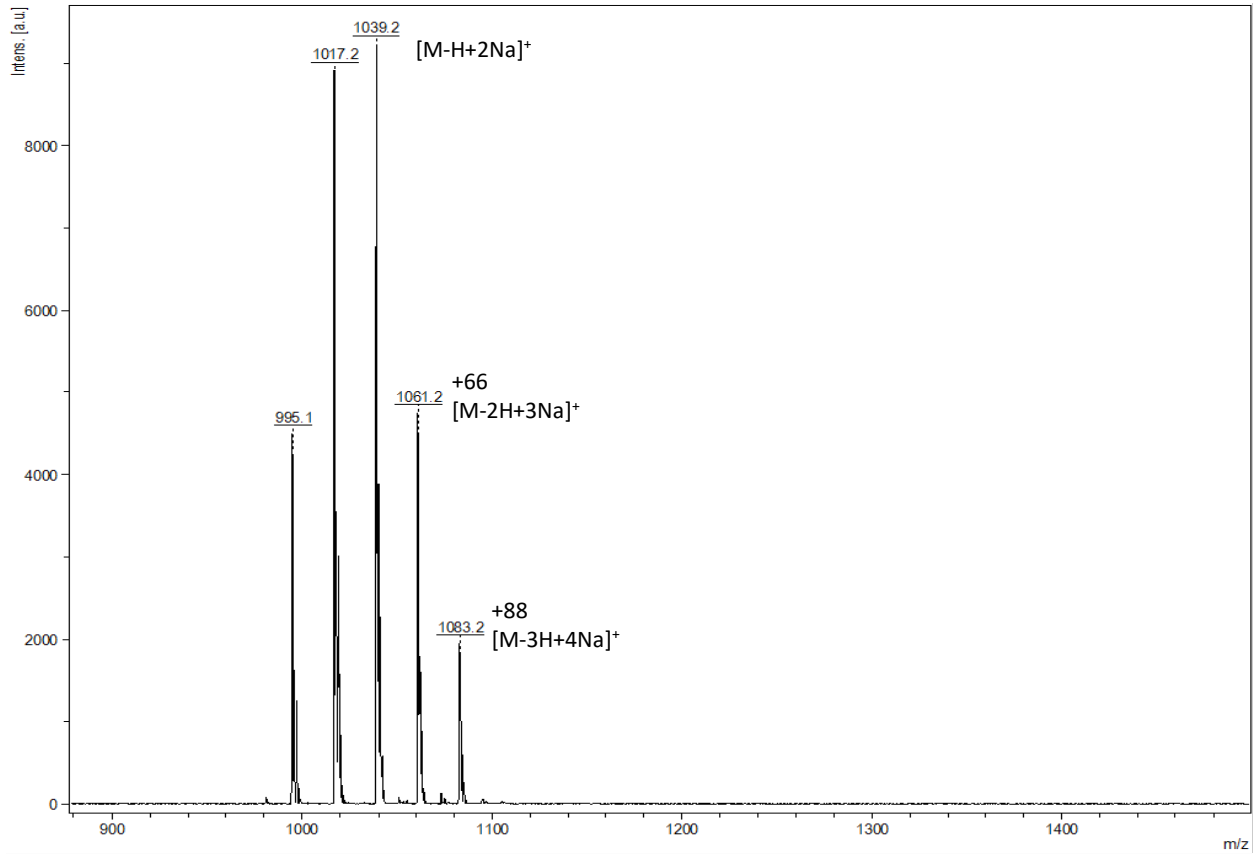

**Figure S2: Analytical HPLC chromatograms of each bisubstrate inhibitor.** All purified peptides were run on an Aeris PEPTIDE 3.6u XB-C18 (250 x 4.6 mm) column. The samples were analyzed using a UV detector at 214nm, and the intensities of the signals were quantified to calculate the percent composition of the sample. H4K8CoA and H4K12CoA were analyzed using a gradient of 2-25% acetonitrile in water over 13 minutes. H4K5CoA and H4K16CoA were analyzed using a gradient of 2-30% acetonitrile in water over 13 minutes. LysCoA was analyzed using a gradient of 2-37% acetonitrile in water over 23 minutes. For the following traces retention times ( $t_R$ ) are reported.

**H4K5CoA.**  $t_R$ : 9.1 min

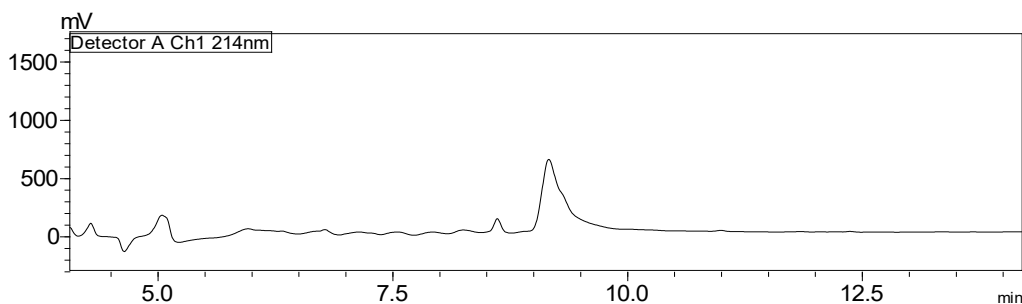

**H4K8CoA.**  $t_R$ : 12.9 min

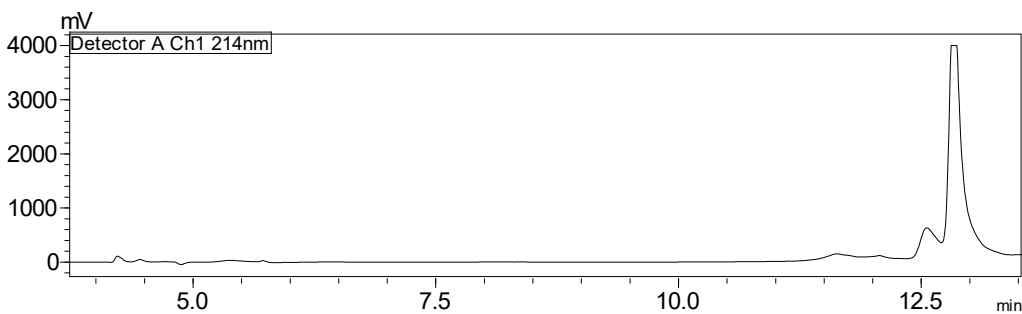

**H4K12CoA.**  $t_R$ : 10.5 min

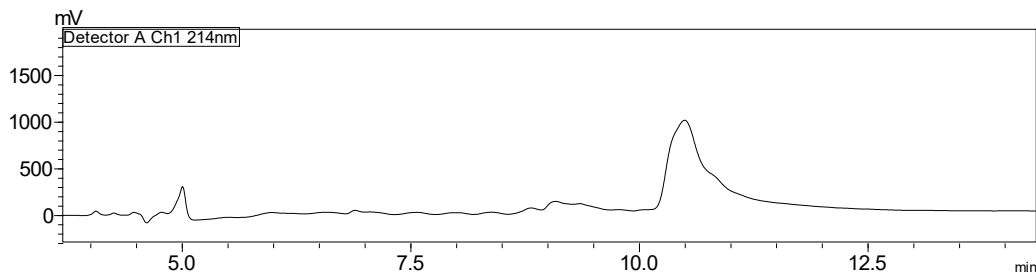

**H4K16CoA.**  $t_R$ : 8.8 min

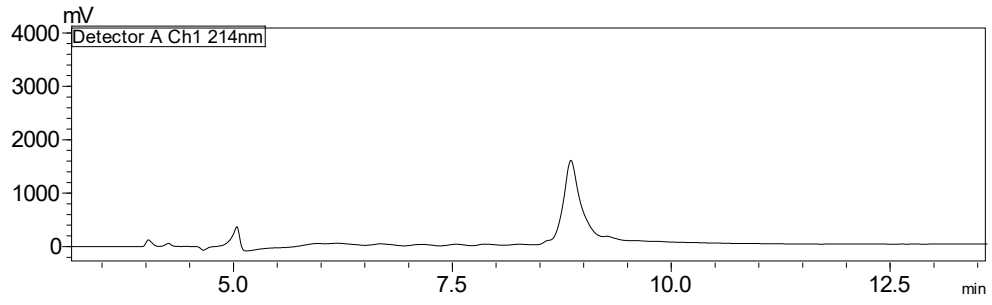

**Lys-CoA.**  $t_R$ : 8.6 min

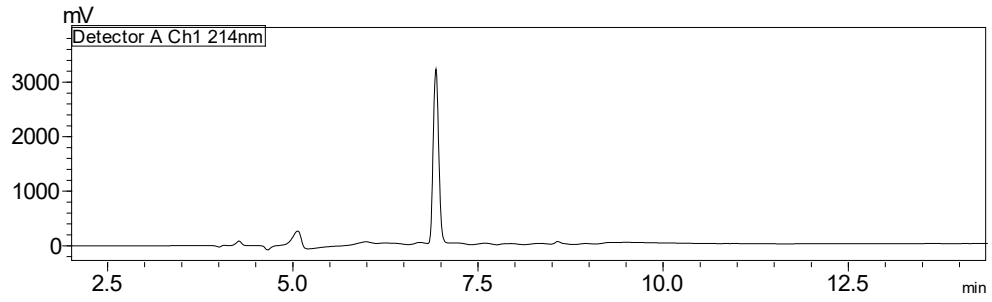

**Figure S3: Fitting data to Morrison equation to obtain  $K_i^{app}$  values of each compounds tested with HAT1.** The SPA was used to measure the potency of each inhibitor against HAT1. Reactions containing 40 nM HAT1, 2.5  $\mu$ M H4-20 BTN, and 1  $\mu$ M [ $^3$ H]AcCoA were incubated at 30°C for 20 min.

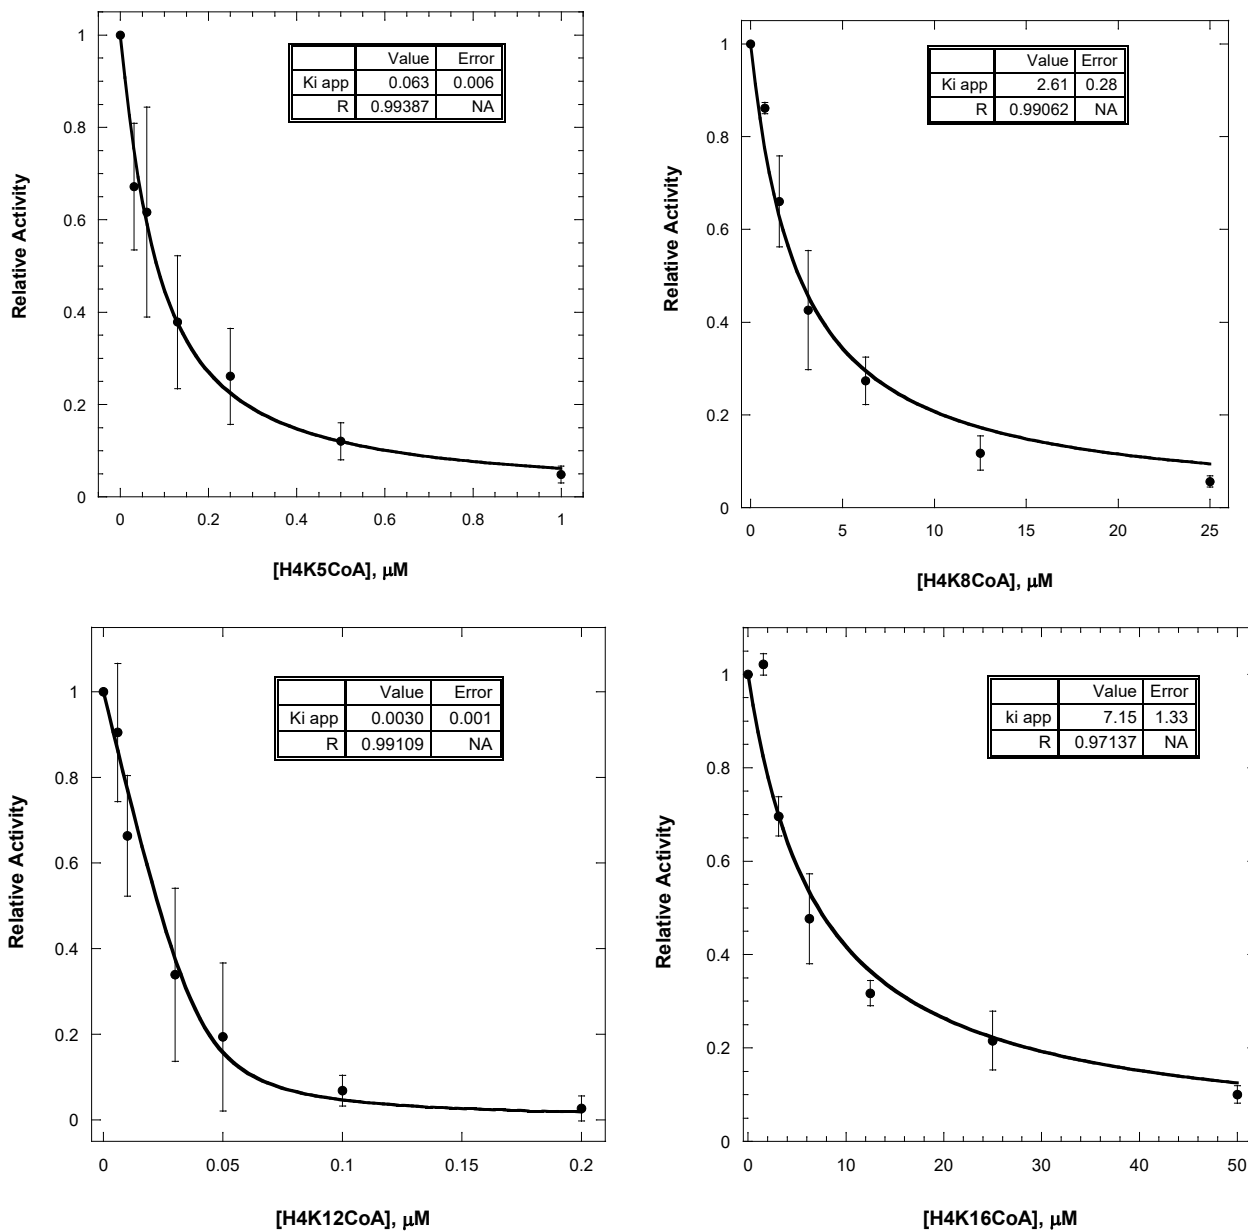



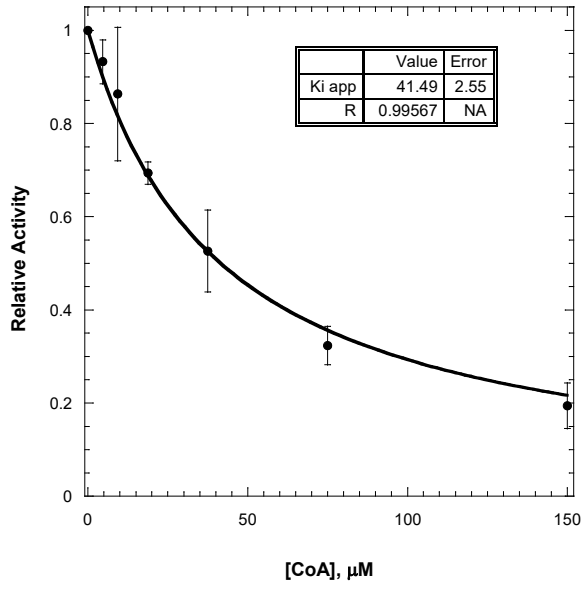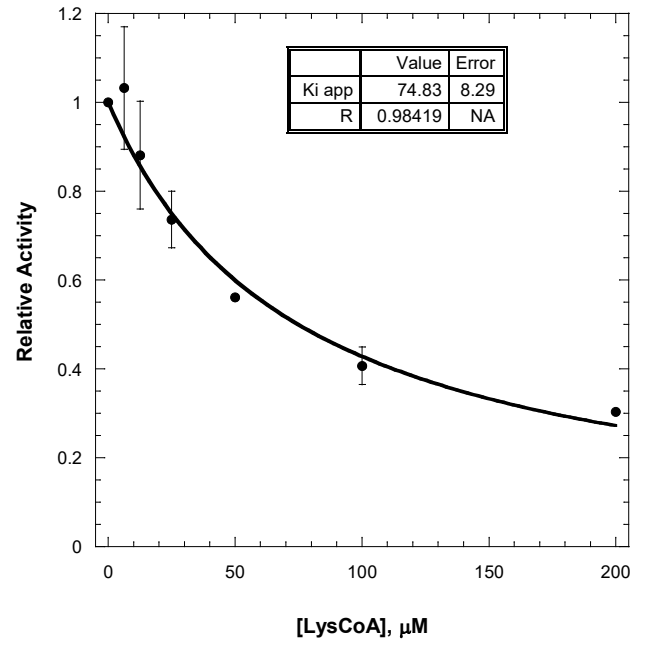

Supplement: NIHMS1006234-supplement-Supp_figS1-3.pdf [file NIHMS1006234-supplement-Supp_figS1-3.pdf]
